# Supplementary material
Source: MDPI journal article supplement (https://www.mdpi.com/2227-9717/10/8/1608)

# Variation of *Salvia officinalis* L. Essential Oil and Hydrolate Composition and Their Antimicrobial Activity

- <sup>1</sup> Institute of Field and Vegetable Crops Novi Sad, Maksima Gorkog 30, 21000 Novi Sad, Serbia
- <sup>2</sup> Institute of General and Physical Chemistry, Studentski trg 10–12, 11000 Belgrade, Serbia
- <sup>3</sup> Institute of Food Technology in Novi Sad, University of Novi Sad, Bul cara Lazara 1, 21000 Novi Sad, Serbia
- <sup>4</sup> Faculty of Medicine, University of Novi Sad, Hajduk Veljkova 3, 21000 Novi Sad, Serbia
- <sup>5</sup> Institute of Chemistry, Technology and Metallurgy, Njegoševa 12, 11000 Belgrade, Serbia
- <sup>6</sup> Faculty of Technology Novi Sad, University of Novi Sad, Bulevar cara Lazara 1, 21000 Novi Sad, Serbia
- <sup>7</sup> Faculty of Chemistry, Studentski trg 12-16, Department of Organic Chemistry, Beograd, Serbia

\* Correspondence: latopezo@yahoo.co.uk; Tel.: +381-11-3283-185

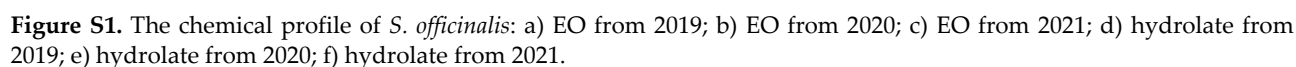

Supplement: s1 [file s1]
